# Supplementary material for: Microwave-assisted synthesis of nitrogen and boron co-doped graphene and its application for enhanced electrochemical detection of hydrogen peroxide
Source: Royal Society of Chemistry journal article supplement (doi:10.1039/c3ra44284e), 2013-01-01
Supplement: c3ra44284e.pdf [file c3ra44284e.pdf]

## **Electronic Supplementary Information**

### **Microwave-Assisted Synthesis of Nitrogen and Boron Co-doped Graphene and Its Application for Enhanced Electrochemical Detection of Hydrogen Peroxide**

Guo-Hai Yang, Yuhui Zhou, Jiajun Wu, Jun-Tao Cao, Ling-Ling Li, Hong-Ying Liu, and Jun-Jie Zhu \*

State Key Laboratory of Analytical Chemistry for Life Science, School of Chemistry and Chemical Engineering, Nanjing University, Nanjing 210093, P. R. China. Fax&Tel: +86 2583597204; E-mail: jjzhu@nju.edu.cn

Graphene oxide (GO) was synthesized from natural graphite powder. Briefly, Graphite powder (1.0 g) was put into a mixture of concentrated  $\text{H}_2\text{SO}_4$  (12 mL),  $\text{K}_2\text{S}_2\text{O}_8$  (2.5 g) and  $\text{P}_2\text{O}_5$  (2.5 g). The solution was heated to 80 °C and kept stirring for 4 h. The pre-oxidized product could be obtained by filtering and washing with distilled water. Re-oxidation was carried out as follows: Pretreated graphite powder (1.0 g) was put into cold (0 °C) concentrated  $\text{H}_2\text{SO}_4$  (36 mL) with successively stirring. Then,  $\text{KMnO}_4$  (5.0 g) was added gradually under stirring and the temperature of the mixture was kept below 10 °C. The solution was reacted for 4 h at 35 °C, and then distilled water (360 mL) and 30%  $\text{H}_2\text{O}_2$  solution (5.0 mL) was added, after which the color of the solution changed to bright yellow. The mixture was successively washed with 5% HCl solution and distilled water to remove the metal ions and residual acids.

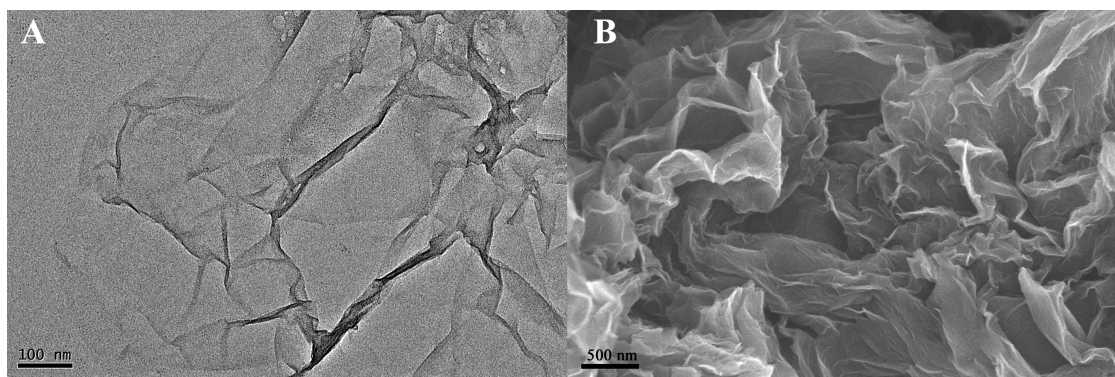

Figure S1. Additional TEM (A) and SEM (B) images of NB-G.

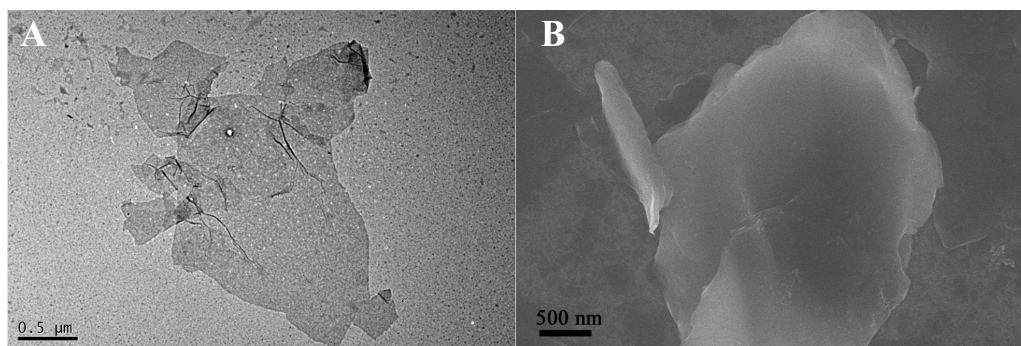

Figure S2. Typical TEM (A) and SEM (B) image of the sample prepared using conventional heating method followed by high-temperature annealing.

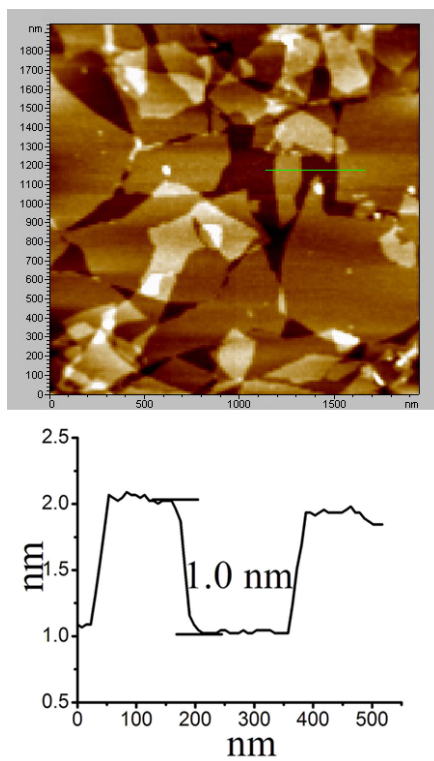

Figure S3. Typical AFM image of GO.

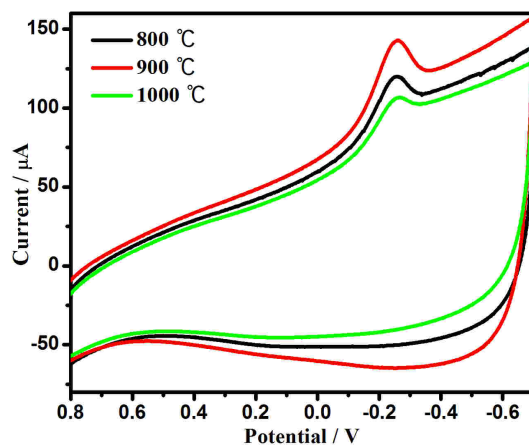

Figure S4. CV curves for the samples obtained under different annealing temperatures in  $\text{N}_2$ -saturated 0.1 M PBS (pH 7.4) in the presence of 2.5 mM  $\text{H}_2\text{O}_2$ .

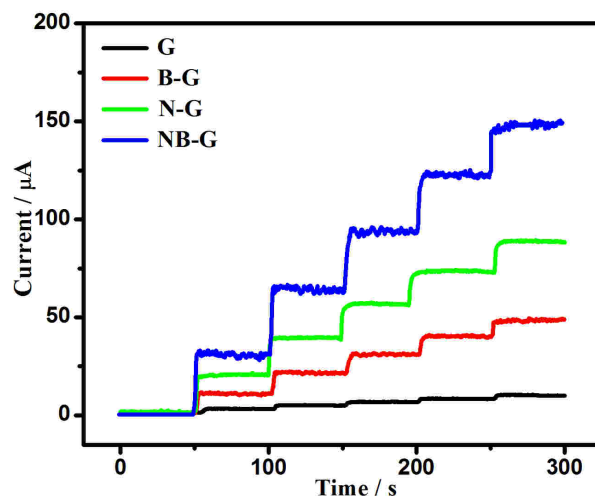

Figure S5. Typical current-time curves at the G, B-G, N-G and NB-G modified GCE in  $N_2$ -saturated PBS (0.1 M, pH 7.4) at -0.25 V with successive addition of 0.5 mM  $H_2O_2$ .

Table S1. Summary of the analytical performances of reported  $H_2O_2$  detection systems.

| nanocomposite <sup>a</sup>    | detection limit ( $\mu M$ ) | linear range ( $\mu M$ ) | reference |
|-------------------------------|-----------------------------|--------------------------|-----------|
| NB-G                          | 0.05                        | 0.5-7500                 | this work |
| Au/POM/graphene               | 1.33                        | 5.0-18000                | S1        |
| HRP/graphene/PANI             | 0.08                        | 1-160                    | S2        |
| HRP/graphene                  | 0.1                         | 1-2600                   | S3        |
| Pt-MnO <sub>2</sub> -graphene | 1                           | 2-13330                  | S4        |
| HRP/MWNTs                     | 10                          | 16.7-740                 | S5        |
| NCNTs                         | 1.2                         | 2-140                    | S6        |
| Mb/titanate nanosheets        | 0.6                         | 2-160                    | S7        |
| HRP/3D porous silica          | 3                           | 20-200                   | S8        |

<sup>a</sup> POM: Polyoxometalate; PANI: polyaniline; MWNTs: multiwall carbon nanotubes;

NCNTs: nitrogen-doped carbon nanotubes;

Table S2. Effect of interfering species (100  $\mu\text{M}$ ) on the sensor response with 10  $\mu\text{M}$  of  $\text{H}_2\text{O}_2$  in  $\text{N}_2$ -saturated PBS (0.1 M, pH 7.4).

| Interferent (I)                                                            | $\text{NO}\cdot$ | glucose | Ascorbic acid | $\text{NO}_3^-$ | Ethanol |
|----------------------------------------------------------------------------|------------------|---------|---------------|-----------------|---------|
| $\Delta I_{\text{H}_2\text{O}_2+\text{I}}/\Delta I_{\text{H}_2\text{O}_2}$ | 0.98             | 0.99    | 0.95          | 0.97            | 1.01    |

### Reference

- S1 R. J. Liu, S. W. Li, X. L. Yu, G. J. Zhang, S. J. Zhang, J. N. Yao, B. Keita, L. Nadjo, L. J. Zhi, *Small* 2012, **8**, 1398-1406.
- S2 X. M. Feng, R. M. Liu, Y. W. Ma, R. F. Chen, N. E. Shi, Q. L. Fan, W. Huang, *Adv. Funct. Mater.* 2011, **21**, 2989-2996.
- S3 Q. Zeng, J. Cheng, L. Tang, X. Liu, Y. Liu, J. Li, J. Jiang, *Adv. Funct. Mater.* 2010, **20**, 3366-3372.
- S4 F. Xiao, Y. Li, X. Zan, K. Liao, R. Xu, H. Duan, *Adv. Funct. Mater.* 2012, **22**, 2487-2494.
- S5 L. Qian, X. Yang, *Talanta* 2006, **68**, 721-727.
- S6 X. Xu, S. Jiang, Z. Hu, S. Liu, *ACS Nano* 2010, **4**, 4292-4298.
- S7 L. Zhang, Q. Zhang, J. Li, *Adv. Funct. Mater.* 2007, **17**, 1958-1965.
- S8 W. Yang, Z. Jia, Q. Y. Qian, Y. G. Zhou, X. H. Xia, *Anal. Chem.* 2009, **81**, 3478-3484.
